# Supplementary material for: Increased risk of vascular disease associated with gout: a retrospective, matched cohort study in the UK Clinical Practice Research Datalink
Source: HighWire-hosted journal article supplement (doi:10.1136/annrheumdis-2014-205252), 2014-08-28
Supplement: annrheumdis-2014-205252supp.pdf [file annrheumdis-2014-205252supp.pdf]

Table S1: Time-varying covariates entered into each Cox Regression model

| Vascular Outcome           | Time Varying Covariates                                                                                                                                                    |                                                                                                                                                                                                                                                                                                                                                                          |
|----------------------------|----------------------------------------------------------------------------------------------------------------------------------------------------------------------------|--------------------------------------------------------------------------------------------------------------------------------------------------------------------------------------------------------------------------------------------------------------------------------------------------------------------------------------------------------------------------|
|                            | Model 1                                                                                                                                                                    | Model 2                                                                                                                                                                                                                                                                                                                                                                  |
| <b>Any vascular event</b>  | <ul style="list-style-type: none"> <li>• Age at diagnosis of gout</li> <li>• BMI &gt;25</li> <li>• Ever/never alcohol consumption</li> <li>• Ever/never smoking</li> </ul> | <ul style="list-style-type: none"> <li>• Age at diagnosis of gout</li> <li>• Gender</li> <li>• Pre-index history of HTN</li> <li>• BMI&gt;25</li> <li>• Ever/never alcohol consumption</li> <li>• Ever/never smoking</li> <li>• Charlson co-morbidity index score</li> <li>• Ever/never prescription of aspirin</li> <li>• Ever/never prescription of statins</li> </ul> |
| <b>Any cardiovascular</b>  | <ul style="list-style-type: none"> <li>• Age at diagnosis of gout</li> <li>• Ever/never alcohol consumption</li> <li>• Ever/never smoking</li> </ul>                       | <ul style="list-style-type: none"> <li>• Age at diagnosis of gout</li> <li>• Pre-index history of HTN</li> <li>• Ever/never smoking</li> <li>• Charlson co-morbidity index score</li> <li>• Ever/never prescription of aspirin</li> <li>• Ever/never prescription of statins</li> </ul>                                                                                  |
| <b>Angina Pectoris</b>     | <ul style="list-style-type: none"> <li>• Ever/never smoking</li> </ul>                                                                                                     | <ul style="list-style-type: none"> <li>• Pre-index history of HTN</li> <li>• Ever/never prescription of aspirin</li> <li>• Ever/never prescription of statins</li> </ul>                                                                                                                                                                                                 |
| <b>MI</b>                  | <ul style="list-style-type: none"> <li>• None</li> </ul>                                                                                                                   | <ul style="list-style-type: none"> <li>• Age at diagnosis of gout</li> <li>• Pre-index history of CKD</li> <li>• Ever/never prescription of aspirin</li> <li>• Ever/never prescription of statins</li> </ul>                                                                                                                                                             |
| <b>Any cerebrovascular</b> | <ul style="list-style-type: none"> <li>• Age at diagnosis of gout</li> <li>• BMI &gt;25</li> <li>• Ever/never alcohol consumption</li> <li>• Ever/never smoking</li> </ul> | <ul style="list-style-type: none"> <li>• Age at diagnosis of gout</li> <li>• Pre-index history of HTN</li> <li>• Ever/never alcohol consumption</li> <li>• Ever/never smoking</li> </ul>                                                                                                                                                                                 |

|                                                                                                                                                                                                                 |                                                                                                                                                                            |                                                                                                                                                                                                                                                                                            |
|-----------------------------------------------------------------------------------------------------------------------------------------------------------------------------------------------------------------|----------------------------------------------------------------------------------------------------------------------------------------------------------------------------|--------------------------------------------------------------------------------------------------------------------------------------------------------------------------------------------------------------------------------------------------------------------------------------------|
|                                                                                                                                                                                                                 |                                                                                                                                                                            | <ul style="list-style-type: none"> <li>• Charlson co-morbidity index score</li> <li>• Ever/never prescription of aspirin</li> <li>• Ever/never prescription of statins</li> </ul>                                                                                                          |
| <b>CVA</b>                                                                                                                                                                                                      | <ul style="list-style-type: none"> <li>• BMI &gt;25</li> <li>• Ever/never alcohol consumption</li> <li>• Ever/never smoking</li> </ul>                                     | <ul style="list-style-type: none"> <li>• Gender</li> <li>• Pre-index history of HTN</li> <li>• BMI&gt;25</li> <li>• Ever/never smoking</li> <li>• Charlson co-morbidity index score</li> <li>• Ever/never prescription of aspirin</li> <li>• Ever/never prescription of statins</li> </ul> |
| <b>TIA</b>                                                                                                                                                                                                      | <ul style="list-style-type: none"> <li>• Age at diagnosis of gout</li> <li>• BMI &gt;25</li> <li>• Ever/never alcohol consumption</li> <li>• Ever/never smoking</li> </ul> | <ul style="list-style-type: none"> <li>• Ever/never prescription of statins</li> </ul>                                                                                                                                                                                                     |
| <b>PVD</b>                                                                                                                                                                                                      | <ul style="list-style-type: none"> <li>• Age at diagnosis of gout</li> <li>• Ever/never alcohol consumption</li> <li>• Ever/never smoking</li> </ul>                       | <ul style="list-style-type: none"> <li>• Pre-index history of HTN</li> <li>• Ever/never smoking</li> <li>• Ever/never prescription of aspirin</li> <li>• Ever/never prescription of statins</li> </ul>                                                                                     |
| <p>MI = Myocardial Infarction; CVA = Cerebrovascular Accident; TIA = Transient Ischaemic Attack; PVD = Peripheral Vascular Disease; BMI = Body Mass Index; HTN = Hypertension; CKD = Chronic Kidney Disease</p> |                                                                                                                                                                            |                                                                                                                                                                                                                                                                                            |

Table S2: Significance and strength of gout\*gender interaction terms, by outcome

| Outcome                    | Model 1               |           |                          | Model 2               |           |                          |
|----------------------------|-----------------------|-----------|--------------------------|-----------------------|-----------|--------------------------|
|                            | Gender Interaction HR | 95% CI    | P for gender interaction | Gender Interaction HR | 95% CI    | P for gender interaction |
| <b>Any vascular</b>        | 1.22                  | 1.11-1.34 | <0.001                   | 1.20                  | 1.09-1.32 | <0.001                   |
| <b>Any cardiovascular</b>  | 1.24                  | 1.09-1.42 | 0.002                    | 1.22                  | 1.06-1.40 | 0.005                    |
| <b>Angina</b>              | 1.88                  | 1.23-2.89 | 0.004                    | 1.56                  | 1.01-2.41 | 0.043                    |
| <b>MI</b>                  | 1.27                  | 0.90-1.80 | 0.185                    | 1.24                  | 0.87-1.76 | 0.232                    |
| <b>Any cerebrovascular</b> | 1.20                  | 1.03-1.41 | 0.021                    | 1.19                  | 1.02-1.39 | 0.031                    |
| <b>TIA</b>                 | 1.20                  | 0.95-1.53 | 0.131                    | 1.20                  | 0.94-1.53 | 0.145                    |
| <b>CVA</b>                 | 1.32                  | 1.05-1.67 | 0.018                    | 1.30                  | 1.03-1.64 | 0.027                    |
| <b>Peripheral vascular</b> | 1.34                  | 0.97-1.84 | 0.072                    | 1.32                  | 0.96-1.82 | 0.087                    |

HR=Hazard Ratio, CI=Confidence Interval, MI=Myocardial Infarction, TIA=Transient Ischaemic Attack, CVA=Cerebrovascular Attack  
 Model 1 covariates: age at diagnosis of gout (or matched index date), gender, gout\*gender interaction, body mass index >25kg/m<sup>2</sup>, ever/never smoking, ever/never alcohol consumption, Charlson Co-morbidity Score  
 Model 2 covariates include Model 1 and history of hypertension, hyperlipidaemia, chronic kidney disease, ever/never statin use, ever/never aspirin use
